# Supplementary material for: Tissue-specific autophagy responses to aging and stress in C. elegans
Source: PubMed Central journal article supplement (PMC4505168; doi:10.18632/aging.100765), 2015-06-30
Supplement: aging-07-0419-s001.pdf [file aging-07-0419-s001.pdf]

## SUPPLEMENTARY INFORMATION

**Supplementary Table 1. Quantification of all bands in all immunoblots included in figures.** Included are the densitometric measurements for the upper dFP and lower mFP bands, as well as the ratio between them (lower/upper). Blots from (A) Figure 1, (B) Figure 2, (C) Figure 3, (D) Figure 4 and (E) Figure 7.

**A Figure 1C**

|       | control | 2 hours | 4 hours |
|-------|---------|---------|---------|
| upper | 82.07   | 77.40   | 48.15   |
| lower | 35.86   | 106.75  | 159.86  |
| ratio | 0.44    | 1.38    | 3.32    |

**Figure 1E**

|       | dFP control | dFP + RNAi | GFP control | GFP + RNAi |
|-------|-------------|------------|-------------|------------|
| upper | 76.18       | 52.47      | 127.71      | 75.68      |
| lower | 85.98       | 30.10      | 105.76      | 15.04      |
| ratio | 1.13        | 0.57       | 0.83        | 0.20       |

**B Figure 2B**

|       | Ubiquitous | Intestine | Hypodermis | Pharynx | Muscle | Neuron |
|-------|------------|-----------|------------|---------|--------|--------|
| upper | 166.80     | 132.86    | 168.39     | 83.65   | 180.26 | 65.58  |
| lower | 104.15     | 83.66     | 52.95      | 6.80    | 23.01  | 15.27  |
| ratio | 0.62       | 0.63      | 0.31       | 0.08    | 0.13   | 0.23   |

**Figure 2C**

|       | Ubiquitous | Intestine | Hypodermis | Pharynx | Muscle | Neuron |
|-------|------------|-----------|------------|---------|--------|--------|
| upper | 192.38     | 149.04    | 201.86     | 115.33  | 208.36 | 104.51 |
| lower | 150.27     | 89.05     | 67.10      | 4.54    | 20.16  | 11.74  |
| ratio | 0.78       | 0.60      | 0.33       | 0.04    | 0.10   | 0.11   |

**Figure 2D**

|       | Ubiquitous | Intestine | Neuron |
|-------|------------|-----------|--------|
| upper | 131.04     | 114.39    | 99.92  |
| lower | 129.42     | 121.28    | 15.49  |
| ratio | 0.99       | 1.06      | 0.16   |

**C Figure 3A**

|             | Ubiquitous |          | Intestine |         | Hypodermis |         | Pharynx |         | Muscle  |         | Neuron  |         |
|-------------|------------|----------|-----------|---------|------------|---------|---------|---------|---------|---------|---------|---------|
|             | control    | chloro   | control   | chloro  | control    | chloro  | control | chloro  | control | chloro  | control | chloro  |
| upper       | 11880.55   | 7899.57  | 5543.53   | 3127.32 | 7743.19    | 6145.74 | 5449.37 | 5785.67 | 7406.39 | 8683.04 | 2929.83 | 3136.25 |
| lower       | 2681.68    | 10769.98 | 2583.23   | 5624.95 | 2827.13    | 6759.72 | 264.58  | 950.36  | 1286.06 | 2818.49 | 606.67  | 2019.54 |
| ratio       | 0.23       | 1.36     | 0.47      | 1.80    | 0.37       | 1.10    | 0.05    | 0.16    | 0.17    | 0.32    | 0.21    | 0.64    |
| fold change |            | 6.04     |           | 3.86    |            | 3.01    |         | 3.38    |         | 1.87    |         | 3.11    |

**D Figure 4A**

| Fed   | Ubiquitous | Intestine | Hypodermis | Pharynx | Muscle | Neuron |
|-------|------------|-----------|------------|---------|--------|--------|
| upper | 106.36     | 55.68     | 51.19      | 74.14   | 108.89 | 73.92  |
| lower | 145.35     | 65.79     | 66.34      | 15.74   | 39.49  | 57.44  |
| ratio | 1.37       | 1.18      | 1.30       | 0.21    | 0.36   | 0.78   |

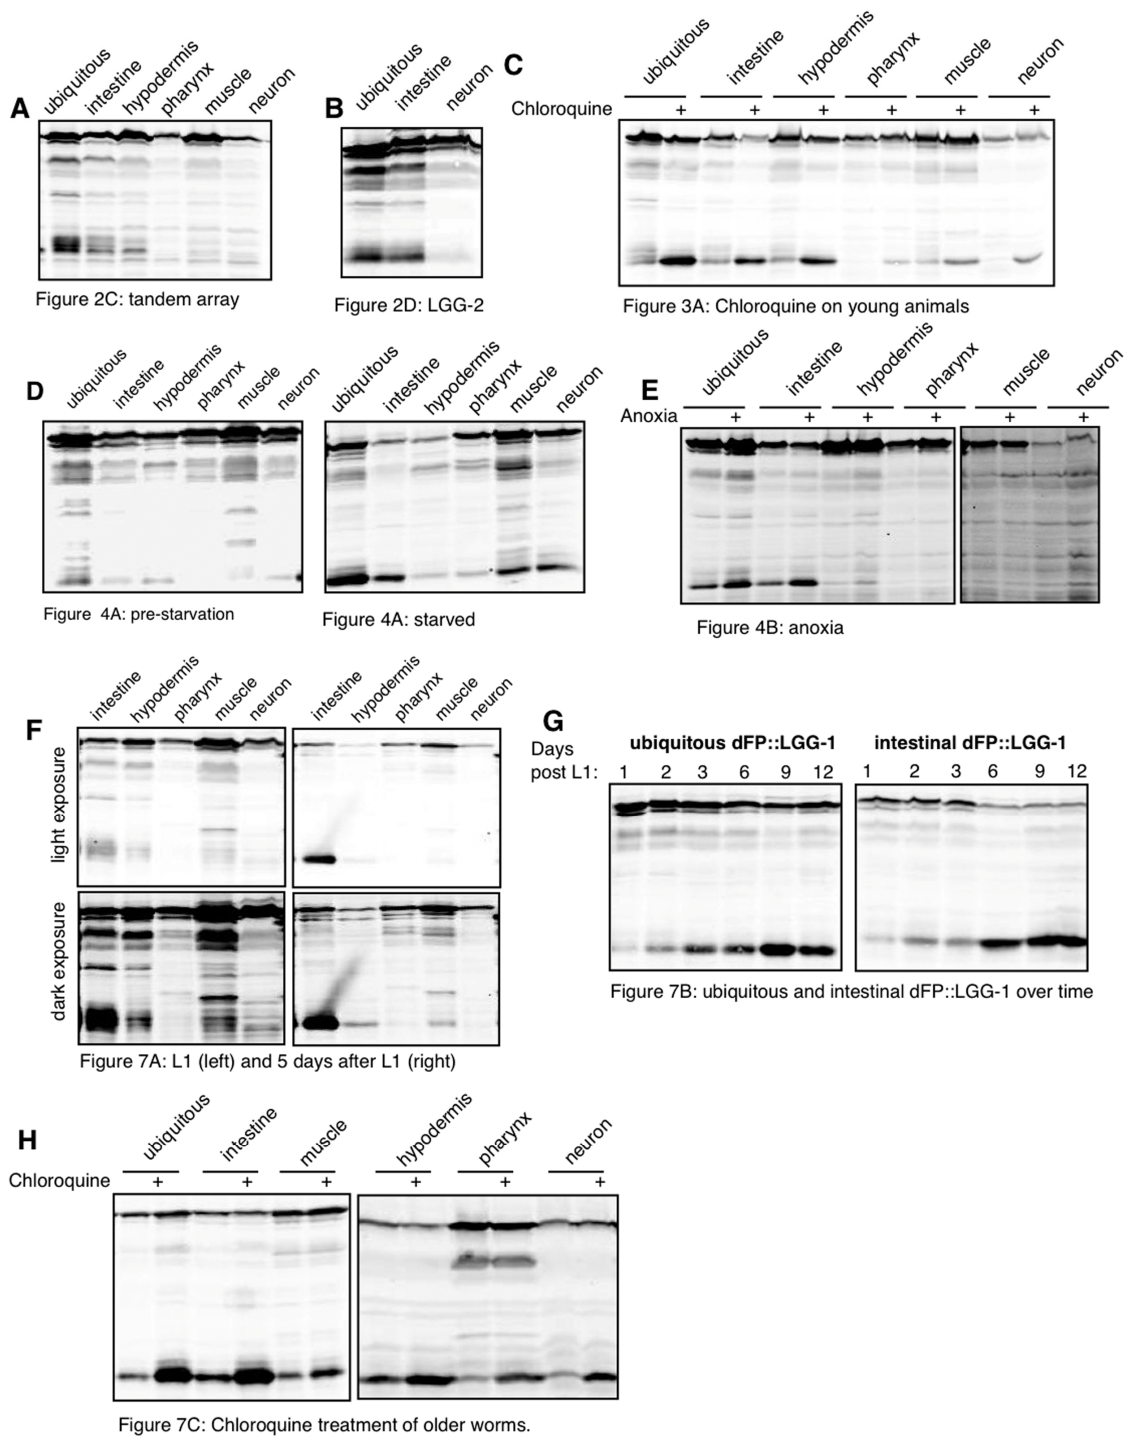

**Supplementary Figure 1. Uncropped immunoblots from all figures in which the full-size blot is not shown with figures included in the main body of the text. (A,B)** Immunoblots in Figure 2, **(C)** Figure 3, **(D, E)** Figure 4, and **(F, G, H)** Figure 7. In **(H)** Please note that the order of tissues is altered compared to the original figure in order to show the uncropped image.
